# Supplementary material for: PathFams: statistical detection of pathogen-associated protein domains
Source: PubMed Central journal article supplement (PMC8442362; doi:10.1186/s12864-021-07982-8), 2021-09-14
Supplement: 12864_2021_7982_MOESM2_ESM.pdf [file 12864_2021_7982_MOESM2_ESM.pdf]

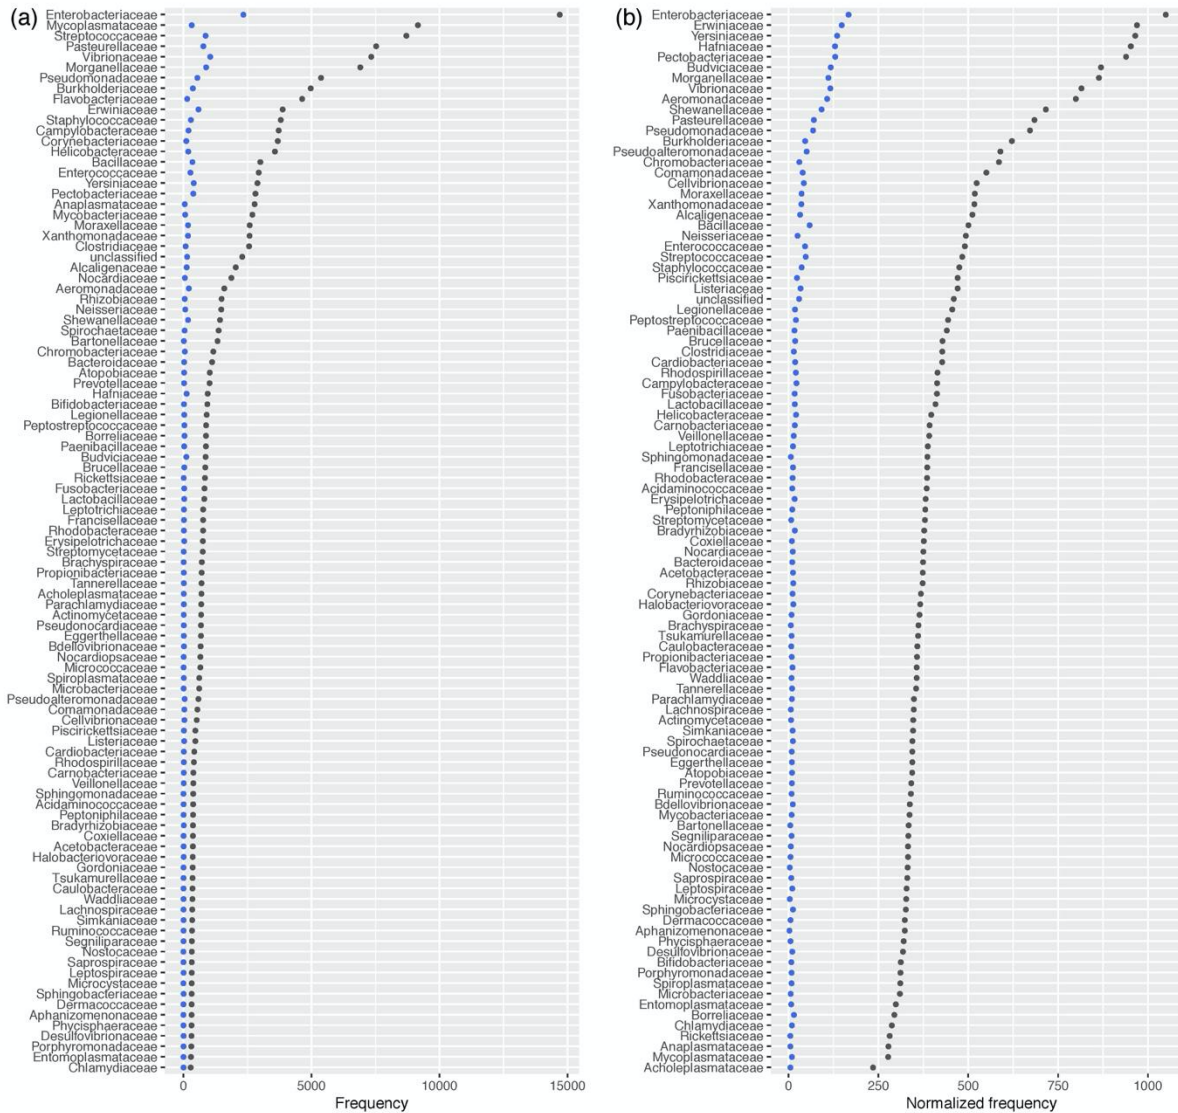

**Figure S1: Distribution of family level taxonomic groups within the pathogen-enriched domain set.**

Total instances (a) and instance rate (b) normalized by number of pathogen proteomes in that taxonomic family. Each plot is reordered based on frequency. DUFs are in blue.

**Table S1: Top 20 pathogen-associated domains.** Families were ranked by fold change and are present in at least 5 pathogens. Proteomes with domain include all proteomes in the Pfam proteome collection (not just bacteria) and so may be larger than the sum of the Pathogens and Background (bacterial) columns.

|                | Pathogens | Background (bacterial) | $P_{adj}$ | Fold change (bacterial) | Proteomes with domain |
|----------------|-----------|------------------------|-----------|-------------------------|-----------------------|
| DUF1410        | 5         | 1                      | 0         | 111.54                  | 6                     |
| DUF1600        | 5         | 2                      | 0         | 55.77                   | 7                     |
| DUF5378        | 5         | 2                      | 0         | 55.77                   | 7                     |
| Leader_Trp     | 5         | 2                      | 0         | 55.77                   | 7                     |
| MFS_Mycoplasma | 25        | 11                     | 0         | 50.7                    | 36                    |
| DUF31          | 31        | 17                     | 0         | 40.68                   | 48                    |
| DUF5385        | 9         | 5                      | 0         | 40.15                   | 14                    |
| Lambda_Kil     | 5         | 3                      | 0         | 37.18                   | 49                    |
| Staphopain_pro | 5         | 3                      | 0         | 37.18                   | 8                     |
| Toxin_trans    | 5         | 3                      | 0         | 37.18                   | 9                     |
| Lipoprotein_X  | 21        | 13                     | 0         | 36.04                   | 34                    |
| DUF2618        | 6         | 4                      | 0         | 33.46                   | 10                    |
| DUF2684        | 6         | 4                      | 0         | 33.46                   | 10                    |
| FinO_N         | 6         | 4                      | 0         | 33.46                   | 11                    |
| Mycoplasma_p37 | 24        | 16                     | 0         | 33.46                   | 40                    |
| DUF2714        | 22        | 15                     | 0         | 32.72                   | 37                    |
| Lipoprotein_10 | 22        | 15                     | 0         | 32.72                   | 37                    |
| Strep_SA_rep   | 7         | 5                      | 0         | 31.23                   | 15                    |
| Peptidase_M27  | 5         | 4                      | 0         | 27.88                   | 10                    |
| Toxin_R_bind_N | 5         | 4                      | 0         | 27.88                   | 13                    |

**Table S2: Pathogen-enriched domain coverage of virulence factor databases.** The number of proteins with at least one pathogen-enriched domain in the different virulence factor databases, as well as within certain virulence factor categories from VFDB. The proportion of this pathogen-enriched domain coverage is shown for proteins in the entire dataset and for only proteins in the dataset that had a domain match to Pfam v32.0.

|                            | Proteins with a pathogen-enriched domain | Out of proteins with a Pfam domain (%) | Out of total proteins (%) |
|----------------------------|------------------------------------------|----------------------------------------|---------------------------|
| <b>Victors</b>             | 1579                                     | 34                                     | 32                        |
| <b>VFDB (full dataset)</b> | 8341                                     | 32                                     | 29                        |
| <b>Toxins</b>              | 470                                      | 63                                     | 60                        |
| <b>Biofilm formation</b>   | 47                                       | 50                                     | 44                        |
| <b>Secretion system</b>    | 2027                                     | 33                                     | 28                        |
| <b>Iron uptake</b>         | 622                                      | 31                                     | 31                        |
| <b>Adherence</b>           | 1417                                     | 27                                     | 26                        |
| <b>Enzyme</b>              | 100                                      | 24                                     | 23                        |
| <b>Invasion</b>            | 526                                      | 21                                     | 21                        |
| <b>Motility</b>            | 381                                      | 18                                     | 18                        |
| <b>Regulation</b>          | 103                                      | 16                                     | 16                        |
| <b>Immune evasion</b>      | 64                                       | 13                                     | 13                        |

**Table S3: Top 5 environment-associated domains from soil, marine, and human gut metagenomes.**

Shown in the table are the normalized average adjusted family sizes of each domain family in each environment. The list is ranked by the *p*-value and then by the normalized average adjusted family size of the environment the domain family is associated with.

|                               | <i>P</i> <sub>adj</sub> | Soil   | Marine | Human Gut |
|-------------------------------|-------------------------|--------|--------|-----------|
| <b>Soil - associated</b>      |                         |        |        |           |
| <b>Ycel</b>                   | 3.27x10 <sup>-33</sup>  | 50.96  | 16.56  | 0.60      |
| <b>Virul_fac_BrkB</b>         | 8.95x10 <sup>-33</sup>  | 113.75 | 13.41  | 33.69     |
| <b>zf-HC2</b>                 | 9.67x10 <sup>-33</sup>  | 72.42  | 1.29   | 17.35     |
| <b>DUF1501</b>                | 1.10x10 <sup>-32</sup>  | 97.85  | 38.51  | 0.00      |
| <b>GerE</b>                   | 1.22x10 <sup>-32</sup>  | 242.00 | 21.89  | 109.79    |
| <b>Marine - associated</b>    |                         |        |        |           |
| <b>T4_neck-protein</b>        | 2.13x10 <sup>-33</sup>  | 0.07   | 31.79  | 0.03      |
| <b>UvsY</b>                   | 2.13x10 <sup>-33</sup>  | 0.07   | 22.92  | 0.01      |
| <b>Gp5_OB</b>                 | 2.13x10 <sup>-33</sup>  | 0.04   | 17.31  | 0.00      |
| <b>Phage-Gp8</b>              | 2.14x10 <sup>-33</sup>  | 0.03   | 43.29  | 0.01      |
| <b>DUF2237</b>                | 2.14x10 <sup>-33</sup>  | 5.61   | 30.92  | 0.01      |
| <b>Human gut - associated</b> |                         |        |        |           |
| <b>DUF4906</b>                | 2.13x10 <sup>-33</sup>  | 0.00   | 0.00   | 23.80     |
| <b>DUF4925</b>                | 2.13x10 <sup>-33</sup>  | 0.00   | 0.04   | 17.62     |
| <b>LPD16</b>                  | 2.13x10 <sup>-33</sup>  | 0.05   | 0.00   | 14.15     |
| <b>Cys_rich_VLP</b>           | 2.13x10 <sup>-33</sup>  | 0.01   | 0.00   | 10.28     |
| <b>Lipocalin_8</b>            | 2.13x10 <sup>-33</sup>  | 0.06   | 0.02   | 7.87      |

**Table S4: Top 5 environment-associated DUFs from the soil, marine, and human gut.** Shown in the table are the normalized average adjusted family sizes of each domain family in each environment. The list is ranked by the *p*-value and then by the normalized average adjusted family size of the environment the domain family is associated with.

|                               | <b>P<sub>adj</sub></b> | <b>Soil</b> | <b>Marine</b> | <b>Human Gut</b> |
|-------------------------------|------------------------|-------------|---------------|------------------|
| <b>Soil - associated</b>      |                        |             |               |                  |
| <b>DUF1501</b>                | 1.10x10 <sup>-32</sup> | 97.85       | 38.51         | 0.00             |
| <b>DUF1800</b>                | 1.35x10 <sup>-32</sup> | 53.35       | 19.41         | 0.00             |
| <b>DUF2277</b>                | 1.52x10 <sup>-32</sup> | 7.99        | 0.04          | 0.00             |
| <b>DUF2382</b>                | 1.94x10 <sup>-32</sup> | 24.83       | 0.00          | 0.01             |
| <b>DUF488</b>                 | 2.42x10 <sup>-32</sup> | 29.67       | 0.96          | 9.72             |
| <b>Marine - associated</b>    |                        |             |               |                  |
| <b>DUF2237</b>                | 2.14x10 <sup>-33</sup> | 5.61        | 30.92         | 0.01             |
| <b>DUF1330</b>                | 4.54x10 <sup>-33</sup> | 10.95       | 54.19         | 0.08             |
| <b>DUF2805</b>                | 7.59x10 <sup>-33</sup> | 0.87        | 27.34         | 0.00             |
| <b>DUF4815</b>                | 7.90x10 <sup>-33</sup> | 0.55        | 95.72         | 0.09             |
| <b>DUF2061</b>                | 1.08x10 <sup>-32</sup> | 0.73        | 15.74         | 0.01             |
| <b>Human gut - associated</b> |                        |             |               |                  |
| <b>DUF4906</b>                | 2.13x10 <sup>-33</sup> | 0.00        | 0.00          | 23.80            |
| <b>DUF4925</b>                | 2.13x10 <sup>-33</sup> | 0.00        | 0.04          | 17.62            |
| <b>DUF2023</b>                | 2.14x10 <sup>-33</sup> | 0.02        | 0.03          | 6.55             |
| <b>DUF4317</b>                | 2.91x10 <sup>-33</sup> | 0.28        | 0.05          | 25.03            |
| <b>DUF5119</b>                | 2.91x10 <sup>-33</sup> | 0.07        | 0.03          | 16.50            |

**Table S5: GO term enrichment in environment-associated domain sets.** Fold change is within domains with a Pfam annotation in the environmental samples.

|                                                               | Environment-associated domains with GO term | Non-environment-associated domains with GO term | Fold change | Padj                   |
|---------------------------------------------------------------|---------------------------------------------|-------------------------------------------------|-------------|------------------------|
| <b>Soil - associated</b>                                      |                                             |                                                 |             |                        |
| transposase activity                                          | 9                                           | 2                                               | 50.4        | 9.85x10 <sup>-6</sup>  |
| transposition, DNA-mediated                                   | 11                                          | 3                                               | 41.1        | 7.95x10 <sup>-7</sup>  |
| heme binding                                                  | 9                                           | 15                                              | 6.72        | 4.38x10 <sup>-2</sup>  |
| oxidation-reduction process                                   | 43                                          | 184                                             | 2.62        | 1.36x10 <sup>-4</sup>  |
| <b>Marine - associated</b>                                    |                                             |                                                 |             |                        |
| cytochrome complex assembly                                   | 6                                           | 0                                               | Inf         | 3.08x10 <sup>-4</sup>  |
| photosystem II reaction center                                | 6                                           | 1                                               | 55.7        | 1.26x10 <sup>-3</sup>  |
| photosynthesis, light reaction                                | 5                                           | 1                                               | 46.4        | 1.02x10 <sup>-2</sup>  |
| flavin adenine dinucleotide binding                           | 9                                           | 3                                               | 27.8        | 6.55x10 <sup>-5</sup>  |
| photosystem I                                                 | 8                                           | 3                                               | 24.7        | 3.19x10 <sup>-4</sup>  |
| oxidoreductase activity, acting on the CH-CH group of donors  | 5                                           | 2                                               | 23.2        | 2.63x10 <sup>-2</sup>  |
| tricarboxylic acid cycle                                      | 5                                           | 2                                               | 23.2        | 2.63x10 <sup>-2</sup>  |
| nickel cation binding                                         | 5                                           | 2                                               | 23.2        | 2.63x10 <sup>-2</sup>  |
| photosynthesis                                                | 25                                          | 16                                              | 14.5        | 1.15x10 <sup>-12</sup> |
| photosystem II                                                | 11                                          | 8                                               | 12.8        | 1.10x10 <sup>-4</sup>  |
| <b>Human gut - associated</b>                                 |                                             |                                                 |             |                        |
| mismatch repair                                               | 8                                           | 0                                               | Inf         | 3.81x10 <sup>-4</sup>  |
| mismatched DNA binding                                        | 6                                           | 0                                               | Inf         | 8.88x10 <sup>-3</sup>  |
| spore germination                                             | 5                                           | 0                                               | Inf         | 3.95x10 <sup>-2</sup>  |
| phosphoenolpyruvate-dependent sugar phosphotransferase system | 11                                          | 4                                               | 14.3        | 8.53x10 <sup>-4</sup>  |
| cobalamin biosynthetic process                                | 9                                           | 4                                               | 11.7        | 1.17x10 <sup>-2</sup>  |
| hydrolase activity, hydrolyzing O-glycosyl compounds          | 22                                          | 16                                              | 7.17        | 6.50x10 <sup>-6</sup>  |
| carbohydrate metabolic process                                | 39                                          | 35                                              | 5.81        | 9.65x10 <sup>-10</sup> |

**Table S6: Top 20 pathogen-associated Pfam families that are also enriched in the human gut microbiome.** Families are ranked by fold change in pathogen proteomes. N = # proteomes with domain,  $f_p$  = # bacterial pathogen proteomes with domain,  $f_{np}$  = # non-pathogen proteomes (bacterial) with domain.

|                        | N   | $f_p$ | $f_{np}$ | $P_{adj}$              | Fold change in pathogens | Human gut environment-association ( $P_{adj}$ ) |
|------------------------|-----|-------|----------|------------------------|--------------------------|-------------------------------------------------|
| <b>LcrG</b>            | 16  | 7     | 9        | $1.60 \times 10^{-7}$  | 17.35                    | $1.37 \times 10^{-21}$                          |
| <b>DUF4948</b>         | 13  | 3     | 10       | $4.30 \times 10^{-2}$  | 6.69                     | $7.23 \times 10^{-27}$                          |
| <b>Mac-1</b>           | 47  | 10    | 36       | $2.67 \times 10^{-5}$  | 6.20                     | $4.18 \times 10^{-16}$                          |
| <b>Gp58</b>            | 58  | 6     | 24       | $3.62 \times 10^{-3}$  | 5.58                     | $2.79 \times 10^{-18}$                          |
| <b>BNR_3</b>           | 47  | 7     | 30       | $2.05 \times 10^{-3}$  | 5.21                     | $1.75 \times 10^{-20}$                          |
| <b>zinc-ribbons_6</b>  | 175 | 32    | 142      | $5.02 \times 10^{-13}$ | 5.03                     | $4.02 \times 10^{-21}$                          |
| <b>HrpB7</b>           | 44  | 8     | 36       | $1.14 \times 10^{-3}$  | 4.96                     | $1.68 \times 10^{-23}$                          |
| <b>Glyco_transf_52</b> | 120 | 21    | 99       | $2.94 \times 10^{-8}$  | 4.73                     | $1.23 \times 10^{-21}$                          |
| <b>DUF2492</b>         | 202 | 35    | 166      | $2.74 \times 10^{-13}$ | 4.70                     | $2.27 \times 10^{-25}$                          |
| <b>HDC</b>             | 43  | 7     | 34       | $4.33 \times 10^{-3}$  | 4.59                     | $7.11 \times 10^{-27}$                          |
| <b>Thiol_cytolysin</b> | 187 | 30    | 153      | $1.20 \times 10^{-10}$ | 4.37                     | $5.38 \times 10^{-21}$                          |
| <b>Glyco_hydro_98C</b> | 32  | 5     | 27       | $3.25 \times 10^{-2}$  | 4.13                     | $9.11 \times 10^{-19}$                          |
| <b>HU-DNA_bdg</b>      | 58  | 9     | 49       | $1.97 \times 10^{-3}$  | 4.10                     | $2.27 \times 10^{-23}$                          |
| <b>PagP</b>            | 245 | 37    | 203      | $5.23 \times 10^{-12}$ | 4.07                     | $1.22 \times 10^{-16}$                          |
| <b>CBM32</b>           | 40  | 6     | 34       | $2.01 \times 10^{-2}$  | 3.94                     | $2.13 \times 10^{-33}$                          |
| <b>Pertactin</b>       | 316 | 45    | 266      | $2.79 \times 10^{-13}$ | 3.77                     | $1.23 \times 10^{-17}$                          |
| <b>DUF1430</b>         | 98  | 14    | 84       | $1.70 \times 10^{-4}$  | 3.72                     | $3.62 \times 10^{-21}$                          |
| <b>DUF3173</b>         | 112 | 16    | 96       | $4.76 \times 10^{-5}$  | 3.72                     | $1.76 \times 10^{-18}$                          |
| <b>Glyco_hydro_98M</b> | 42  | 6     | 36       | $2.59 \times 10^{-2}$  | 3.72                     | $1.46 \times 10^{-18}$                          |
| <b>MuF_C</b>           | 121 | 15    | 91       | $1.02 \times 10^{-4}$  | 3.68                     | $1.86 \times 10^{-19}$                          |
